# Supplementary material for: Observations on Food Consumption Behaviors During the COVID-19 Pandemic in Oman
Source: PubMed Central journal article supplement (PMC8821884; doi:10.3389/fpubh.2021.779654), 2022-01-25
Supplement: Table_1.pdf [file Table_1.pdf]

## Appendix A: Questionnaire

| <b>Section 1: Socio-demographics</b>                   |                                                                                                                                                                                                                                                                                                                                                                                                                                                                                                                                                                                                                                                                    |
|--------------------------------------------------------|--------------------------------------------------------------------------------------------------------------------------------------------------------------------------------------------------------------------------------------------------------------------------------------------------------------------------------------------------------------------------------------------------------------------------------------------------------------------------------------------------------------------------------------------------------------------------------------------------------------------------------------------------------------------|
| 1                                                      | Gender                                                                                                                                                                                                                                                                                                                                                                                                                                                                                                                                                                                                                                                             |
| 2                                                      | Where do you live? Urban region/ Rural area                                                                                                                                                                                                                                                                                                                                                                                                                                                                                                                                                                                                                        |
| 3                                                      | Nationality: Omani/Non Omani                                                                                                                                                                                                                                                                                                                                                                                                                                                                                                                                                                                                                                       |
| 4                                                      | Age                                                                                                                                                                                                                                                                                                                                                                                                                                                                                                                                                                                                                                                                |
| 5                                                      | Level of education                                                                                                                                                                                                                                                                                                                                                                                                                                                                                                                                                                                                                                                 |
| 6                                                      | How would you describe your household income compared to other households in your country?                                                                                                                                                                                                                                                                                                                                                                                                                                                                                                                                                                         |
| 7                                                      | Occupation                                                                                                                                                                                                                                                                                                                                                                                                                                                                                                                                                                                                                                                         |
| 8                                                      | What is your household composition?                                                                                                                                                                                                                                                                                                                                                                                                                                                                                                                                                                                                                                |
| 9                                                      | How many people are currently living in your home?                                                                                                                                                                                                                                                                                                                                                                                                                                                                                                                                                                                                                 |
| 10                                                     | Have you lost your job or had any pay reduction in your salary due to COVID-19?<br>Yes/No                                                                                                                                                                                                                                                                                                                                                                                                                                                                                                                                                                          |
| <b>Section 2: Food buying and consumption behavior</b> |                                                                                                                                                                                                                                                                                                                                                                                                                                                                                                                                                                                                                                                                    |
| 11                                                     | <p>Below is a list of food-related behaviors. Please indicate how that behavior has changed for you as a result of the coronavirus (COVID-19) becoming serious in your country (7-point response scale: never = 0; first time = 1; much less = 2; slightly less = 3; about the same = 4; moderately more = 5; much more = 6.)</p> <ul style="list-style-type: none"> <li>• Buying local food (produced in your country)</li> <li>• Ordering groceries online</li> <li>• Buying food in person from a large supermarket</li> <li>• Buying food in person from a small supermarket or grocery store</li> <li>• Having meals delivered directly to my home</li> </ul> |
| 12                                                     | <p>What has changed in your shopping behavior during the outbreak of COVID-19 and lockdown?</p> <ul style="list-style-type: none"> <li>• I go shopping less than usual</li> <li>• I go shopping like I used to</li> <li>• I go shopping more than usual</li> </ul>                                                                                                                                                                                                                                                                                                                                                                                                 |
| 13                                                     | <p>What has changed in the extent of your purchase during the outbreak of COVID-19 and lockdown?</p> <ul style="list-style-type: none"> <li>• I buy a lot more than usual</li> <li>• I buy more than usual</li> <li>• I buy as same as usual</li> <li>• I buy less than usual</li> <li>• I buy a lot less than usual</li> </ul>                                                                                                                                                                                                                                                                                                                                    |
| 14                                                     | <p>Since the coronavirus (COVID-19) became serious in your country, have you eaten or drunk more or less of the following foods? (7-point response scale)</p> <ul style="list-style-type: none"> <li>• Fruits/ Vegetables</li> <li>• Meat</li> <li>• Healthy food</li> </ul>                                                                                                                                                                                                                                                                                                                                                                                       |

|                                                                                                                                                                                                                                                                                                                                                                                                                                                                                                                                                                                                                                                                                              |
|----------------------------------------------------------------------------------------------------------------------------------------------------------------------------------------------------------------------------------------------------------------------------------------------------------------------------------------------------------------------------------------------------------------------------------------------------------------------------------------------------------------------------------------------------------------------------------------------------------------------------------------------------------------------------------------------|
| <ul style="list-style-type: none"> <li>• Unhealthy food (Fast food)</li> <li>• Water</li> <li>• Can</li> <li>• Candy, Cookies, cakes, and pastries</li> <li>• Healthy Snacks</li> <li>• Unhealthy snacks</li> <li>• Packaged frozen foods</li> <li>• Canned food</li> </ul>                                                                                                                                                                                                                                                                                                                                                                                                                  |
| <p>15 Since the coronavirus (COV-19) became serious in your country, have you done more or less of the following food related activities than you used to? (7-point response scale)</p> <ul style="list-style-type: none"> <li>• Eating at home alone</li> <li>• Eating with family members</li> <li>• Eating out (e.g. restaurants/cafeteria/fast food)</li> <li>• Eating at someone else's place (e.g. family, friends)</li> <li>• Ordering take-away or fast food meals with deliveries</li> <li>• Cooking and preparing food</li> <li>• Spending a lot of time cooking</li> <li>• Making easy meals (e.g., instant foods, etc.)</li> <li>• Eating between meals (e.g. snacks)</li> </ul> |
| <p>16 Have you stocked up on food and beverages because of the coronavirus (COVID-19)?<br/>Yes/No</p>                                                                                                                                                                                                                                                                                                                                                                                                                                                                                                                                                                                        |
| <p>17 What type of food you stocked up the most during the outbreak of COVID-19 and lockdown? (Please select all that apply)</p> <ul style="list-style-type: none"> <li>• Cereals and their products (bread, rice, pasta, flour, etc.)</li> <li>• Roots and tubers (potatoes, etc.)</li> <li>• Legumes (e.g. peas, chickpeas)</li> <li>• Sugar</li> <li>• Oil</li> <li>• Fruits and vegetables</li> <li>• Meat and meat products</li> <li>• Fish and seafood</li> <li>• Milk and dairy products</li> <li>• Canned food</li> <li>• None</li> </ul>                                                                                                                                            |
| <p>18 Since the COVID-19 outbreak, did you notice that any of these items is less available? (Please select all that apply)</p> <ul style="list-style-type: none"> <li>• Cereals and products (bread, rice, pasta, flour, etc.)</li> <li>• Roots and tubers (potatoes, etc.)</li> <li>• Legumes (e.g. peas, chickpeas)</li> <li>• Sugar</li> <li>• Oil</li> <li>• Fruits and vegetables</li> <li>• Meat and meat products</li> <li>• Fish and seafood</li> </ul>                                                                                                                                                                                                                             |

|                                                                                                                                                                                                                                                                                                                                                                                                                                                                                                                                            |
|--------------------------------------------------------------------------------------------------------------------------------------------------------------------------------------------------------------------------------------------------------------------------------------------------------------------------------------------------------------------------------------------------------------------------------------------------------------------------------------------------------------------------------------------|
| <ul style="list-style-type: none"> <li>• Milk and dairy products</li> <li>• Canned food</li> <li>• None</li> </ul>                                                                                                                                                                                                                                                                                                                                                                                                                         |
| <p>19 Since the COVID-19 outbreak, did you notice any price increase for any of these items? (Please select all that apply)</p> <ul style="list-style-type: none"> <li>• Cereals and products (bread, rice, pasta, flour, etc.)</li> <li>• Roots and tubers (potatoes, etc.)</li> <li>• Legumes (e.g. peas, chickpeas)</li> <li>• Sugar</li> <li>• Oil</li> <li>• Fruits and vegetables</li> <li>• Meat and meat products</li> <li>• Fish and seafood</li> <li>• Milk and dairy products</li> <li>• Canned food</li> <li>• None</li> </ul> |
| <p>20 How does stocking up on items make you feel? (5-point response scale: 1 (not at all),...5 (very much))</p> <ul style="list-style-type: none"> <li>• Stocking up on items makes me feel less anxious</li> <li>• Stocking up on items makes me feel more secure</li> <li>• Stocking up on items comforts me</li> <li>• Stocking up on items gives me a sense of control</li> </ul>                                                                                                                                                     |
| <p>21 Please indicate how concerned you have been since COVID-19 became serious in your country about the following food-related issues? 5-point response scale: 1 (not at all),...5 (very much))</p> <ul style="list-style-type: none"> <li>• Obtaining enough food</li> <li>• Obtaining a variety of food</li> <li>• Access to healthy and safe food</li> <li>• Food prices rising</li> <li>• Food spreading COVID-19</li> </ul>                                                                                                         |
| <p>22 Regarding changes in your food related behaviors since the outbreak of COVID-19: Yes/No</p> <ul style="list-style-type: none"> <li>• Do you buy more food out of fear or anxiety?</li> <li>• Do you eat more food out of fear, anxiety or boredom?</li> <li>• Are you wasting more food than usual?</li> <li>• Are you more aware of how much food you waste?</li> </ul>                                                                                                                                                             |
| <p>23 How has your food wastage changed during the outbreak of COVID-19 and lockdown?</p> <ul style="list-style-type: none"> <li>• It has become much less</li> <li>• Less</li> <li>• Has not changed</li> <li>• More</li> <li>• Much more</li> </ul>                                                                                                                                                                                                                                                                                      |

### Section 3: Emotions

**24 Please indicate your negative feelings since the onset of COVID-19 (5-point response scale: 1 (not at all),...5 (very much))**

- Nervous
- Worried
- Depressed
- Sad
- Scared
- Bored

**25 Please indicate your positive feelings since the onset of COVID-19 (5-point response scale: 1 (not at all),... 5 (very much))**

- Calm
- Optimistic
- Excited
- Happy
